# Supplementary material for: Changes in neuromuscular structure and functions of human colon during ageing are region-dependent
Source: PubMed Central journal article supplement — Gut. 2018 Sep 18;68(7):1210–23. doi: 10.1136/gutjnl-2018-316279 (PMC6594449; doi:10.1136/gutjnl-2018-316279), 2018-09-18
Supplement: gutjnl-2018-316279supp005.pdf [file gutjnl-2018-316279supp005.pdf]

**Supplementary Data File 5.** Univariate analyses to identify effect of patient state and trait variables on responses evoked by 5 Hz EFS in ascending colon.

| VARIABLES                                                                 | MUSCLE RELAXATION |            | P value           |
|---------------------------------------------------------------------------|-------------------|------------|-------------------|
|                                                                           | No (N = 49)       | Yes (N=60) |                   |
| <b>MEDICATIONS</b>                                                        |                   |            |                   |
| <b>Gastrointestinal medications</b>                                       | 17 (34.7%)        | 21 (35.0%) | 0.97 <sup>§</sup> |
| <i>Laxatives</i>                                                          | 3 (6.1%)          | 6 (10.0%)  | 0.51              |
| <i>Antiemetic (5-HT<sub>3</sub> receptor antagonists)</i>                 | 0                 | 0          |                   |
| <i>Peripheral D<sub>2</sub> antagonists (metoclopramide, domperidone)</i> | 1 (2.0%)          | 1 (1.7%)   | 1.00              |
| <i>Proton Pump Inhibitor</i>                                              | 11 (22.4%)        | 18 (30.0%) | 0.38 <sup>§</sup> |
| <i>H<sub>2</sub> antagonist (e.g. ranitidine)</i>                         | 4 (8.2%)          | 5 (8.3%)   | 1.00              |
| <i>Buscopan</i>                                                           | 0                 | 1 (1.7%)   | 1.00              |
| <i>Mebeverine</i>                                                         | 1 (2.0%)          | 1 (1.7%)   | 1.00              |
| <b>Analgesics<sup>†</sup></b>                                             | 22 (44.9%)        | 22 (36.7%) | 0.66 <sup>§</sup> |
| <i>Opiates</i>                                                            | 7 (14.3%)         | 8 (13.3%)  | 0.89 <sup>§</sup> |
| <i>NSAIDs</i>                                                             | 11 (22.4%)        | 13 (21.7%) | 0.92 <sup>§</sup> |
| <i>Paracetamol</i>                                                        | 9 (18.4%)         | 13 (21.7%) | 0.67 <sup>§</sup> |
| <i>Gabapentinoids</i>                                                     | 2 (4.1%)          | 2 (3.3%)   | 1.00              |
| <b>Cardiac medications<sup>†</sup></b>                                    | 31 (63.3%)        | 35 (58.3%) | 0.60 <sup>§</sup> |
| <i>Ca<sup>2+</sup> channel blockers</i>                                   | 8 (16.3%)         | 13 (21.7%) | 0.48 <sup>§</sup> |
| <i>Smooth muscle relaxant (hydralazine, nitrates, nicorandil)</i>         | 2 (4.1%)          | 3 (5.0%)   | 1.00              |
| <i>Diuretics</i>                                                          | 13 (26.5%)        | 13 (21.7%) | 0.55 <sup>§</sup> |
| <i>ACEi or ARB</i>                                                        | 17 (34.7%)        | 14 (23.3%) | 0.19 <sup>§</sup> |
| <i>alpha blocker</i>                                                      | 5 (10.2%)         | 0          | 0.02              |
| <i>beta blocker</i>                                                       | 9 (18.4%)         | 11 (18.3%) | 1.00 <sup>§</sup> |
| <i>Antiarrhythmics</i>                                                    | 0                 | 1 (1.7%)   | 1.00              |
| <i>Antiplatelets / Anticoagulants</i>                                     | 8 (16.3%)         | 5 (8.3%)   | 0.24              |
| <i>Statin</i>                                                             | 16 (32.7%)        | 20 (33.3%) | 0.94 <sup>§</sup> |
| <b>Respiratory medications<sup>†</sup></b>                                | 1 (2.0%)          | 8 (13.3%)  | 0.04              |
| <i>Inhalers</i>                                                           | 1 (2.0%)          | 8 (13.3%)  | 0.04              |
| <i>Other (Montelukast, betahistine, carbocisteine)</i>                    | 0                 | 2 (3.3%)   | 0.50              |
| <b>Genitourinary medications<sup>†</sup></b>                              | 6 (12.2%)         | 2 (3.3%)   | 0.14              |
| <i>Alpha blocker (Genitourinary)</i>                                      | 5 (10.2%)         | 2 (3.3%)   | 0.24              |
| <i>5alpha reductase inhibitor</i>                                         | 3 (6.1%)          | 0          | 0.09              |
| <i>Antispasmodic (oxybutynin, solifenacin, dicyclomine)</i>               | 0                 | 2 (3.3%)   | 0.51              |
| <b>Systemic steroid</b>                                                   | 2 (4.1%)          | 4 (6.7%)   | 0.69              |
| <b>Immunomodulators</b>                                                   | 2 (4.1%)          | 1 (1.7%)   | 0.59              |

|                                                                                     |                        |                   |                         |
|-------------------------------------------------------------------------------------|------------------------|-------------------|-------------------------|
| <b>Antibiotics</b>                                                                  | 0                      | 3 (5.0%)          | 0.25                    |
| <b>Cation-containing agents (Aluminium, calcium, Iron, Lithium)</b>                 | 11 (22.4%)             | 16 (26.7%)        | 0.61 <sup>§</sup>       |
| <b>Endocrine medications†</b>                                                       | <b>14 (28.6%)</b>      | <b>22 (36.7%)</b> | <b>0.37<sup>§</sup></b> |
| <i>Anti-diabetic</i>                                                                | 8 (16.3%)              | 7 (11.7%)         | 0.48 <sup>§</sup>       |
| <i>Vitamin D</i>                                                                    | 4 (8.2%)               | 12 (20.0%)        | 0.11                    |
| <i>Folic acid</i>                                                                   | 0                      | 4 (6.7%)          | 0.13                    |
| <i>Pamidronate and alendronic acid</i>                                              | 2 (4.1%)               | 4 (6.7%)          | 0.69                    |
| <i>thyroxine</i>                                                                    | 2 (4.1%)               | 4 (6.7%)          | 0.69                    |
| <b>CNS &amp; Psychiatric medications†</b>                                           | 5 (10.2%)              | 12 (20.0%)        | 0.16                    |
| <i>Tricyclic antidepressants</i>                                                    | 2 (4.1%)               | 5 (8.3%)          | 0.46                    |
| <i>SSRI AND SNRI</i>                                                                | 3 (6.1%)               | 4 (6.7%)          | 1.00                    |
| <i>Antiparkinsonian drugs (procyclidine)</i>                                        | 0                      | 0                 |                         |
| <i>Other Parkinsonian drug (dopamine agonists)</i>                                  | 0                      | 1 (1.7%)          | 1.00                    |
| <i>Antipsychotic (chlorpromazine, quetiapine, olanzapine)</i>                       | 0                      | 0                 |                         |
| <i>Other antipsychotic (amisulpride, prochlorperazine – D &amp; 5HT antagonist)</i> | 0                      | 0                 |                         |
| <i>Anticonvulsant</i>                                                               | 0                      | 1 (1.7%)          | 1.00                    |
| <i>Benzodiazepine / GABA enhancer</i>                                               | 1 (2.0%)               | 2 (3.3%)          | 1.00                    |
| <b>Anticholinergic<sup>®</sup></b>                                                  | 5 (10.2%) <sup>§</sup> | 11 (18.3%)        | 0.28                    |
| <i>Tricyclic antidepressants</i>                                                    | 2 (4.1%)               | 5 (8.3%)          | 0.46                    |
| <i>Antiparkinsonian drugs (procyclidine)</i>                                        | 0                      | 0                 |                         |
| <i>Antispasmodic (oxybutynin, solifenacin, dicyclomine)</i>                         | 0                      | 2 (3.3%)          | 0.51                    |
| <i>Antipsychotic (chlorpromazine, quetiapine, olanzapine)</i>                       | 0                      | 0                 |                         |
| <i>Antihistamine (diphenhydramine, chlorphenamine, promethazine)</i>                | 3 (6.1%)               | 2 (3.3%)          | 0.66                    |
| <i>Buscopan</i>                                                                     | 0                      | 1 (1.7%)          | 1.00                    |
| <i>Mebeverine</i>                                                                   | 1 (2.0%)               | 1 (1.7%)          | 1.00                    |
| <b>All alpha blocker (cardiac + genitourinary)<sup>®</sup></b>                      | 10 (20.4%)             | 2 (3.3%)          | <b>0.01</b>             |

| <b>MEDICAL HISTORY</b>                                          |            |            |                   |
|-----------------------------------------------------------------|------------|------------|-------------------|
| <b>Any GI condition†</b>                                        | 15 (30.6%) | 19 (31.7%) | 0.91 <sup>§</sup> |
| <i>Diverticular disease</i>                                     | 1 (2.0%)   | 5 (8.3%)   | 0.22              |
| <i>IBD</i>                                                      | 0          | 0          |                   |
| <i>Constipation</i>                                             | 0          | 0          |                   |
| <i>IBS</i>                                                      | 0          | 2 (3.3%)   | 0.50              |
| <i>oesophageal stricture (benign)</i>                           | 0          | 1 (1.7%)   | 1.00              |
| <i>GORD</i>                                                     | 6 (12.2%)  | 7 (11.7%)  | 0.93 <sup>§</sup> |
| <i>Hiatus hernia</i>                                            | 1 (2.0%)   | 3 (5.0%)   | 0.63              |
| <i>Chronic gastritis / ulcers</i>                               | 0          | 4 (6.7%)   | 0.13              |
| <i>Cholecystitis / gallstones</i>                               | 3 (6.1%)   | 1 (1.7%)   | 0.32              |
| <i>Fatty liver / portal hypertension</i>                        | 0          | 1 (1.7%)   | 1.00              |
| <i>Polyps</i>                                                   | 6 (12.2%)  | 3 (5.0%)   | 0.29              |
| <i>Previous cancer</i>                                          | 1 (2.0%)   | 1 (1.7%)   | 1.00              |
| <i>Inguinal / incisional / parastomal hernia</i>                | 1 (2.0%)   | 2 (3.3%)   | 1.00              |
| <i>Perianal condition (e.g. haemorrhoid, abscess)</i>           | 0          | 2 (3.3%)   | 0.50              |
| <i>Previous abdominal surgery</i>                               | 6 (12.2%)  | 8 (13.3%)  | 0.87 <sup>§</sup> |
| <b>Gynaecological conditions†</b>                               | 8 (16.3%)  | 9 (15.0%)  | 0.85 <sup>§</sup> |
| <i>Previous Gynaecological operation</i>                        | 7 (14.3%)  | 8 (13.3%)  | 0.89 <sup>§</sup> |
| <i>Vaginal prolapse</i>                                         | 1 (2.0%)   | 0          | 0.45              |
| <i>Polycystic ovarian syndrome</i>                              | 1 (2.0%)   | 0          | 0.45              |
| <i>Uterine fibroid</i>                                          | 2 (4.1%)   | 1 (1.7%)   | 0.59              |
| <i>Previous ectopic pregnancy</i>                               | 1 (2.0%)   | 0          | 0.45              |
| <i>Previous cancer</i>                                          | 1 (2.0%)   | 3 (5.0%)   | 0.63              |
| <i>Cervical ectropion</i>                                       | 0          | 1 (1.7%)   | 1.00              |
| <i>Endometriosis</i>                                            | 0          | 1 (1.7%)   | 1.00              |
| <b>Any CNS conditions †</b>                                     | 7 (14.3%)  | 10 (16.7%) | 0.73 <sup>§</sup> |
| <i>Parkinson's disease</i>                                      | 1 (2.0%)   | 1 (1.7%)   | 1.00              |
| <i>Alzheimer's or other dementia</i>                            | 1 (2.0%)   | 2 (3.3%)   | 1.00              |
| <i>Cerebral vascular accidents / transient ischaemic attack</i> | 3 (6.1%)   | 3 (5.0%)   | 1.00              |
| <i>Multiple sclerosis</i>                                       | 0          | 0          |                   |
| <i>Epilepsy</i>                                                 | 1 (2.0%)   | 3 (5.0%)   | 0.63              |
| <i>Peripheral neuropathy</i>                                    | 0          | 1 (1.7%)   | 1.00              |
| <i>Previous neurosurgery</i>                                    | 1 (2.0%)   | 0          | 0.45              |
| <i>Benign essential tremor</i>                                  | 0          | 1 (1.7%)   | 1.00              |
| <b>Any psychiatric conditions†</b>                              | 6 (12.2%)  | 4 (6.7%)†  | 0.34              |
| <i>Anxiety disorder</i>                                         | 3 (6.1%)   | 2 (3.3%)   | 0.66              |
| <i>Mood disorder</i>                                            | 3 (6.1%)   | 3 (5.0%)   | 1.00              |
| <i>Personality disorder</i>                                     | 0          | 0          |                   |
| <b>Any endocrine condition†</b>                                 | 14 (28.6%) | 15 (25.0%) | 0.68 <sup>§</sup> |
| <i>Diabetes mellitus</i>                                        | 10 (20.4%) | 9 (15.0%)  | 0.46 <sup>§</sup> |

|                                                          |            |            |                   |
|----------------------------------------------------------|------------|------------|-------------------|
| <i>Neuroendocrine tumour</i>                             | 1 (2.0%)   | 1 (1.7%)   | 1.00              |
| <i>Parathyroid conditions</i>                            | 1 (2.0%)   | 0          | 0.45              |
| <i>Thyroid conditions</i>                                | 2 (4.1%)   | 5 (8.3%)   | 0.46              |
| <b>Any metabolic condition†</b>                          | 30 (61.2%) | 32 (53.3%) | 0.41 <sup>s</sup> |
| <i>Hypertension</i>                                      | 23 (46.9%) | 24 (40.0%) | 0.47 <sup>s</sup> |
| <i>Hypercholesterolaemia</i>                             | 11 (22.4%) | 9 (15.0%)  | 0.32 <sup>s</sup> |
| <i>Hypocalcaemia</i>                                     | 1 (2.0%)   | 2 (3.3%)   | 1.00              |
| <i>Vitamin D deficiency</i>                              | 1 (2.0%)   | 4 (6.7%)   | 0.38              |
| <i>Osteoporosis &amp; other bone disease</i>             | 1 (2.0%)   | 4 (6.7%)   | 0.38              |
| <i>Vitamin B12, folate deficiency</i>                    | 1 (2.0%)   | 0          | 0.45              |
| <b>Any Renal condition†</b>                              | 2 (4.1%)   | 2 (3.3%)   | 1.00              |
| <i>Chronic kidney disease</i>                            | 1 (2.0%)   | 2 (3.3%)   | 1.00              |
| <i>Glomerulonephritis</i>                                | 1 (2.0%)   | 0          | 0.45              |
| <i>Renal transplant</i>                                  | 1 (2.0%)   | 1 (1.7%)   | 1.00              |
| <b>Any Cardiovascular condition†</b>                     | 12 (24.5%) | 14 (23.3%) | 0.89 <sup>s</sup> |
| <i>Ischaemic heart disease (including heart failure)</i> | 6 (12.2%)  | 7 (11.7%)  | 0.93 <sup>s</sup> |
| <i>Valvular disease</i>                                  | 1 (2.0%)   | 3 (5.0%)   | 0.63              |
| <i>Arrhythmia</i>                                        | 6 (12.2%)  | 5 (8.3%)   | 0.54              |
| <i>Previous cardiac surgery</i>                          | 0          | 1 (1.7%)   | 1.00              |
| <i>Peripheral vascular disease</i>                       | 2 (4.1%)   | 2 (3.3%)   | 1.00              |
| <b>Any Respiratory condition†</b>                        | 6 (12.2%)  | 12 (20.0%) | 0.28 <sup>s</sup> |
| <i>airway disease</i>                                    | 3 (6.1%)   | 9 (15.0%)  | 0.22              |
| <i>alveolar disease</i>                                  | 1 (2.0%)   | 2 (3.3%)   | 1.00              |
| <i>Pleural effusion</i>                                  | 1 (2.0%)   | 1 (1.7%)   | 1.00              |
| <i>Obstructive sleep apnoea</i>                          | 0          | 1 (1.7%)   | 1.00              |
| <i>Previous lung cancer</i>                              | 1 (2.0%)   | 0          | 0.45              |
| <b>Any Haematological condition†</b>                     | 7 (14.3%)  | 19 (31.7%) | 0.03 <sup>s</sup> |
| <i>Anaemia</i>                                           | 4 (8.2%)   | 12 (20.0%) | 0.11              |
| <i>VTE</i>                                               | 3 (6.1%)   | 4 (6.7%)   | 0.91              |
| <i>Neutropaenia (autoimmune / chemotherapy related)</i>  | 0          | 2 (3.3%)   | 0.50              |
| <i>Haematological malignancy</i>                         | 0          | 3 (5.0%)   | 0.25              |
| <i>Thalassaemia</i>                                      | 0          | 2 (3.3%)   | 0.50              |
| <i>Hyperglobulinaemia</i>                                | 0          | 1 (1.7%)   | 1.00              |
| <i>Antiphospholipid syndrome</i>                         | 0          | 1 (1.7%)   | 1.00              |
| <b>Any Urological condition†</b>                         | 7 (14.3%)  | 10 (16.7%) | 0.73 <sup>s</sup> |
| <i>Benign prostatic hypertrophy</i>                      | 6 (12.2%)  | 3 (5.0%)   | 0.29              |
| <i>Prostate cancer</i>                                   | 0          | 3 (5.0%)   | 0.25              |
| <i>Renal &amp; renal tract tumour</i>                    | 2 (4.1%)   | 1 (1.7%)   | 0.59              |
| <i>Previous renal calculi</i>                            | 1 (2.0%)   | 0          | 0.45              |
| <i>Previous renal tract infection (severe)</i>           | 0          | 2 (3.3%)   | 0.50              |
| <i>Retroperitoneal fibrosis</i>                          | 0          | 1 (1.7%)   | 1.00              |
| <i>Urinary incontinence / detrusor instability</i>       | 0          | 1 (1.7%)   | 1.00              |
| <b>Any Rheumatological condition</b>                     | 4 (8.2%)   | 5 (8.3%)   | 1.00              |
| <i>Rheumatoid arthritis</i>                              | 1 (2.0%)   | 1 (1.7%)   | 1.00              |
| <i>Polymyalgia rheumatica</i>                            | 1 (2.0%)   | 0          | 0.45              |
| <i>Gout</i>                                              | 3 (6.1%)   | 3 (5.0%)   | 1.00              |

|                                             |                   |                   |                         |
|---------------------------------------------|-------------------|-------------------|-------------------------|
| <i>Systemic lupus erythromatosus</i>        | 0                 | 1 (1.7%)          | 1.00                    |
| <i>Seronegative arthritis</i>               | 0                 | 2 (3.3%)          | 0.50                    |
| <b>Any orthopaedic conditions</b>           | 10 (20.4%)        | 7 (11.7%)         | 0.21 <sup>§</sup>       |
| <i>Osteoarthritis (peripheral joints)</i>   | 6 (12.2%)         | 6 (10.0%)         | 0.71 <sup>§</sup>       |
| <i>Back or spinal problem</i>               | 5 (10.2%)         | 3 (5.0%)          | 0.30                    |
| <b>Smoker / ex-smoker</b>                   | 10 (20.4%)        | 7 (11.7%)         | 0.21 <sup>§</sup>       |
| <b>EtOH user (moderate or more)</b>         | 5 (10.2%)         | 9 (15.0%)         | 0.57                    |
| <b>Previous abdominal/gynaecological op</b> | <b>12 (24.5%)</b> | <b>14 (23.3%)</b> | <b>0.89<sup>§</sup></b> |

**KEY:** The table shows the numbers of patients (with % of total) with each factor. Results are shown using Fisher's exact test, Chi-Square test<sup>§</sup>, where appropriate (due to multiple comparisons  $P \leq 0.01$  was considered statistically significant). † some patients had more than 1 medications or conditions for that category. ø medications from different category but with similar action on certain receptor type.
